# Supplementary material
Source: PubMed Central journal article supplement (PMC7838731)
Supplement: NIHMS1663656-supplement-suppl_material.pdf [file NIHMS1663656-supplement-suppl_material.pdf]

## Supporting Information to Manuscript:

### Urine Nuclear Magnetic Resonance (NMR) Metabolomics in Age-Related Macular Degeneration

Inês Laíns<sup>1,2,3,4</sup> ¶, Daniela Duarte<sup>5</sup> ¶, António S. Barros<sup>5</sup>, †, Ana Sofia Martins<sup>5</sup>, Tatiana J. Carneiro<sup>5</sup>, João Q. Gil<sup>2,3,4</sup>, John B. Miller<sup>1</sup>, Marco Marques<sup>2,3,4</sup>, Tânia S. Mesquita<sup>3</sup>, Patrícia Barreto<sup>3</sup>, Ivana K. Kim<sup>1</sup>, Maria da Luz Cachulo<sup>2,3,4</sup>, Demetrios G. Vavvas<sup>1</sup>, Isabel M. Carreira<sup>2</sup>, Joaquim Neto Murta<sup>2,4</sup>, Rufino Silva<sup>2,3,4</sup>, Joan W. Miller<sup>1</sup>, Deeba Husain<sup>1</sup> & and Ana M. Gil<sup>5</sup> & \*

<sup>1</sup> Department of Ophthalmology, Massachusetts Eye and Ear, Harvard Medical School, Boston, United States.

<sup>2</sup> Faculty of Medicine, University of Coimbra (FMUC), Coimbra, Portugal.

<sup>3</sup> Association for Innovation and Biomedical Research on Light and Image (AIBILI), Coimbra, Portugal.

<sup>4</sup> Department of Ophthalmology, Centro Hospitalar e Universitário de Coimbra (CHUC), Coimbra, Portugal.

<sup>5</sup> CICECO- Aveiro Institute of Materials (CICECO/UA), Department of Chemistry, University of Aveiro, 3810-193 Aveiro, Portugal.

¶ The first two authors contributed equally. & The last two authors contributed equally.

† current address: Department of Cardiothoracic Surgery and Physiology, Faculty of Medicine, Porto 4200-319, Portugal

\* Corresponding author. E-mail: [agil@ua.pt](mailto:agil@ua.pt)

**Figure S1**

Controls (\_\_\_\_) Early AMD (.....) Int. AMD (- - - -) Late AMD (.....)

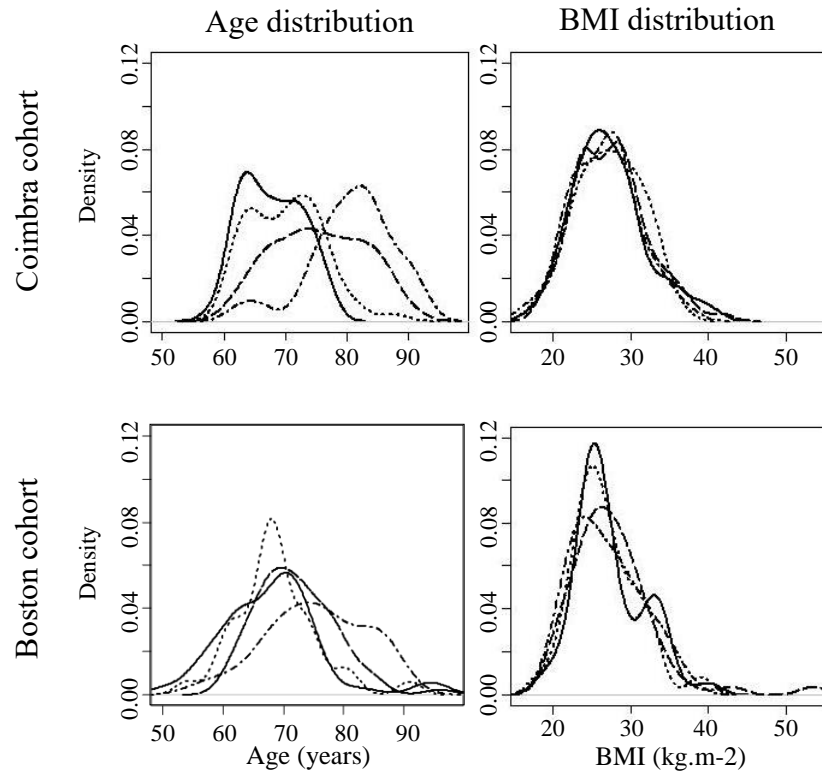

**Figure S1.** Histograms of age and BMI distributions for controls and AMD patients for Coimbra and Boston cohorts: controls

**Figure S2**

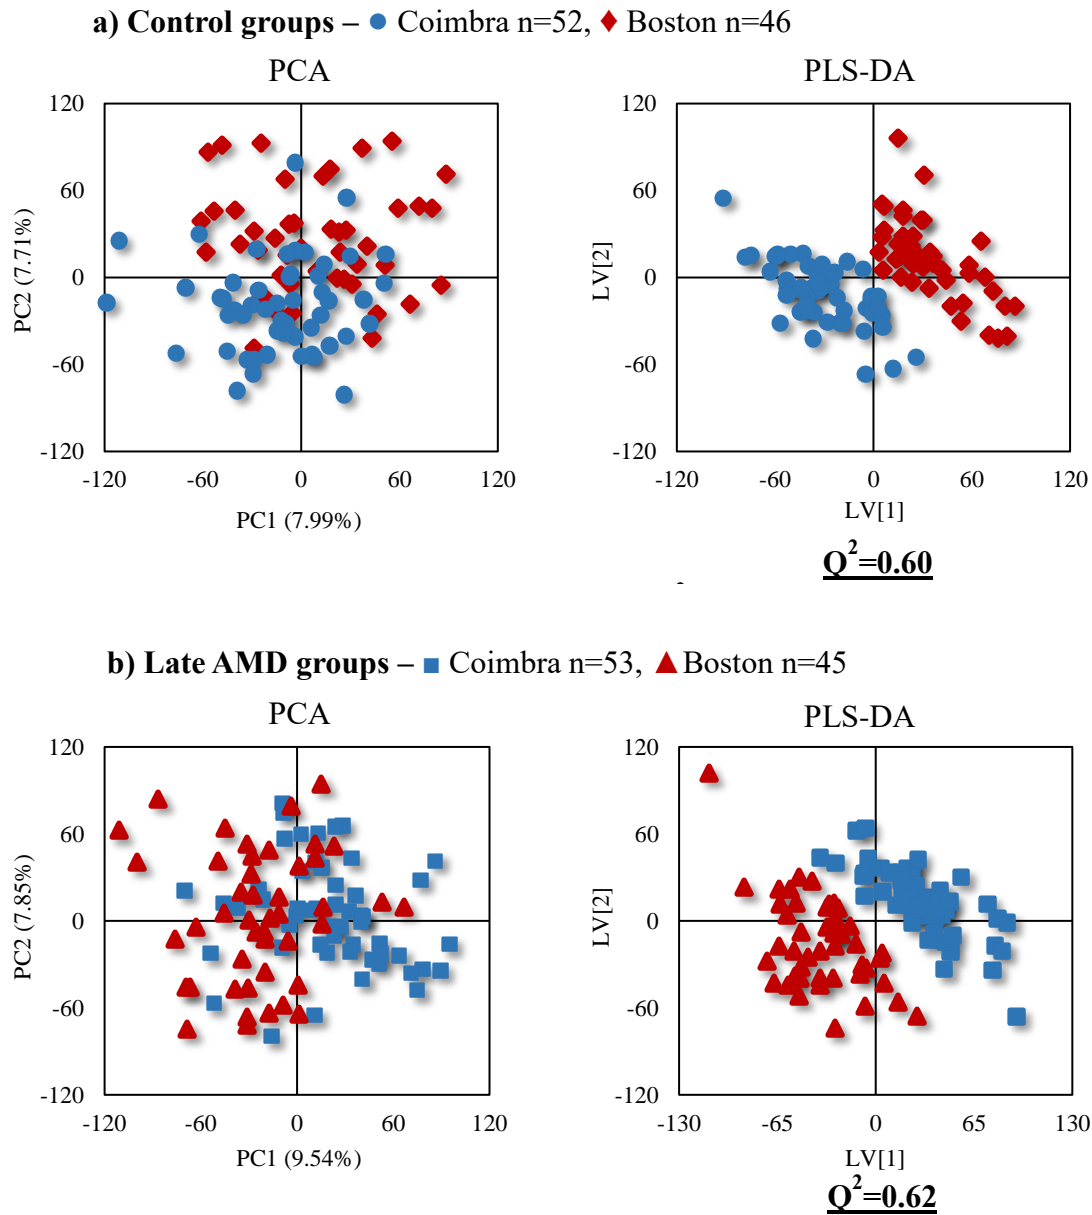

**Figure S2.** PCA and PLS-DA scores obtained for a) control and b) late AMD groups from each cohort. In the PCA of controls, two outlier samples were removed from the Coimbra cohort; in the PCA of late AMD, two Boston outliers and one Coimbra outlier were removed.

**Figure S3**

◆ Control group (both cohorts) n=98, ■ AMD patients (both cohorts) n=397

**a) PCA**

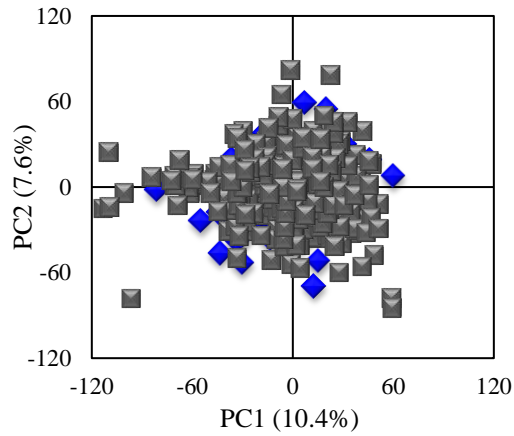

**b) PLS-DA**

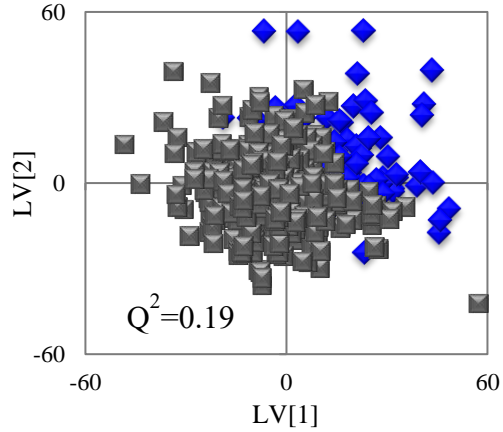

**Figure S3.** a) PCA and b) PLS-DA scores obtained for all controls (Coimbra and Boston cohorts) compared to all AMD patients (Coimbra and Boston, all disease stages).

Figure S4

a) Coimbra cohort

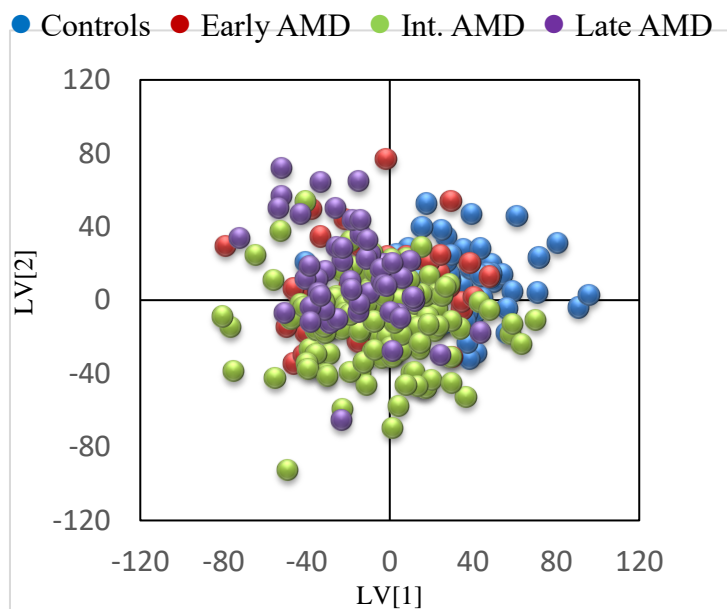

b) Boston cohort

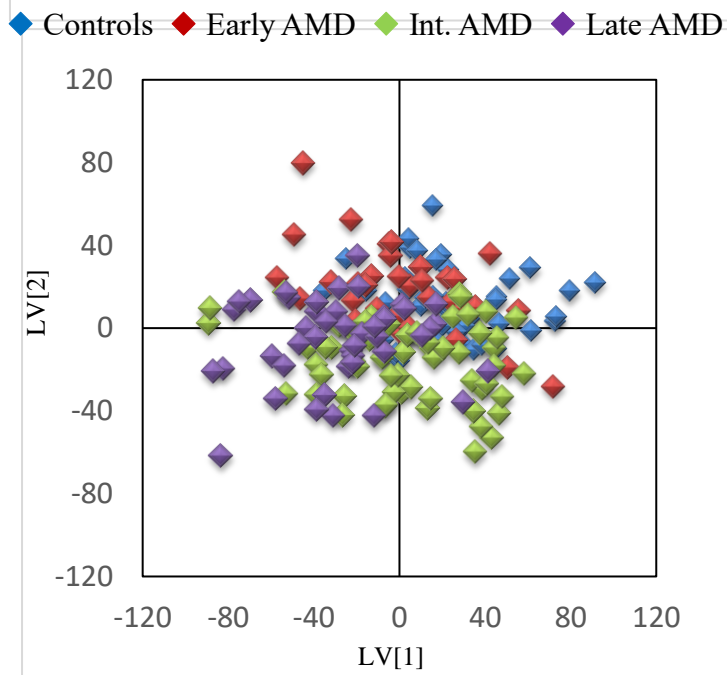

**Figure S4.** PLS-DA scores for variable-selected spectra of urine from Controls vs Late AMD in the a) Coimbra cohort, circles (blue, Controls, n=52; purple, Late AMD, n=53) and b) Boston cohort, diamonds (blue, Controls, n=46; purple, Late AMD, n=48).  $Q^2$  value and MCCV results are shown for each model.

**Figure S5**

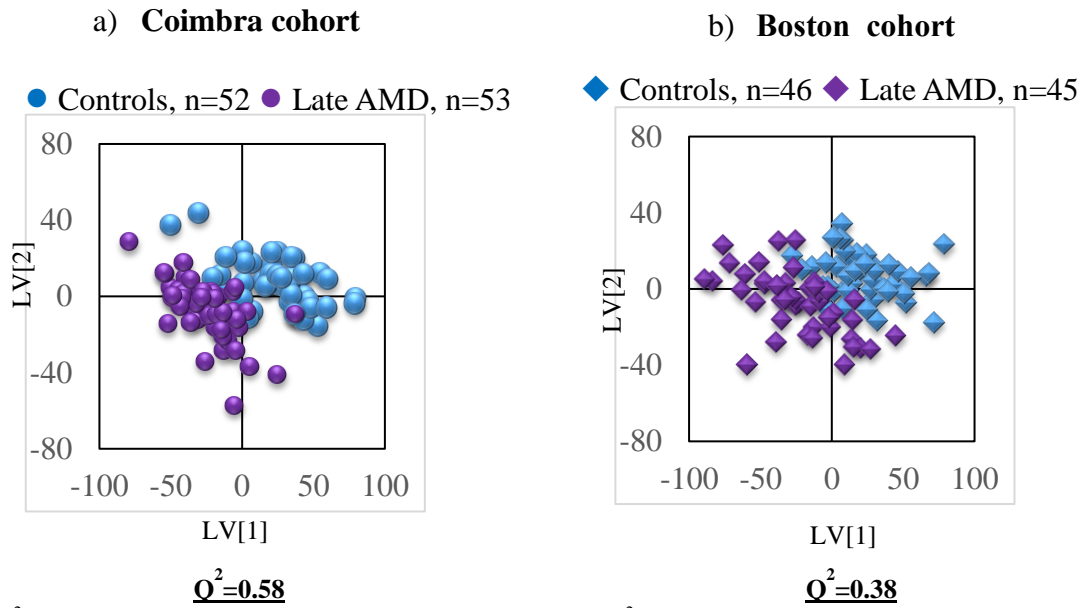

**Figure S5.** PLS-DA obtained with the full resolution spectra for both study cohorts: a) Coimbra cohort, circles (blue: controls, n=52; red: early AMD, n=56; green: intermediate AMD, n=141; purple: late AMD, n=54); b) Boston cohort, diamonds (blue: controls, n=46; red: early AMD, n=33; green: intermediate AMD, n=60; purple: late AMD, n=45).

**Figure S6**

a)

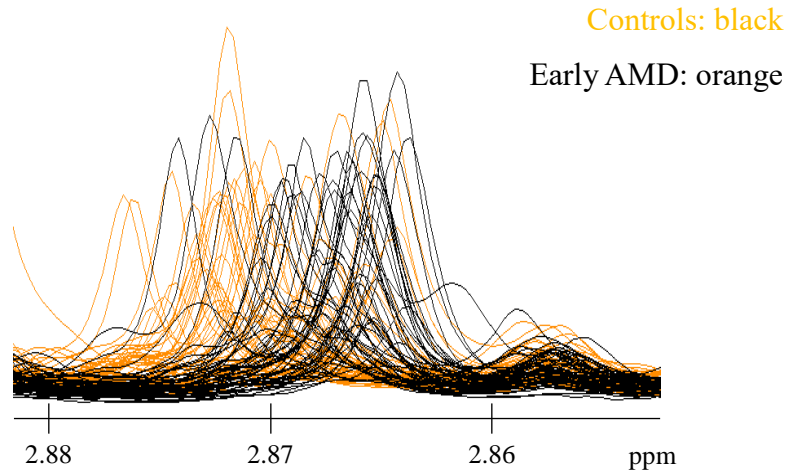

b)

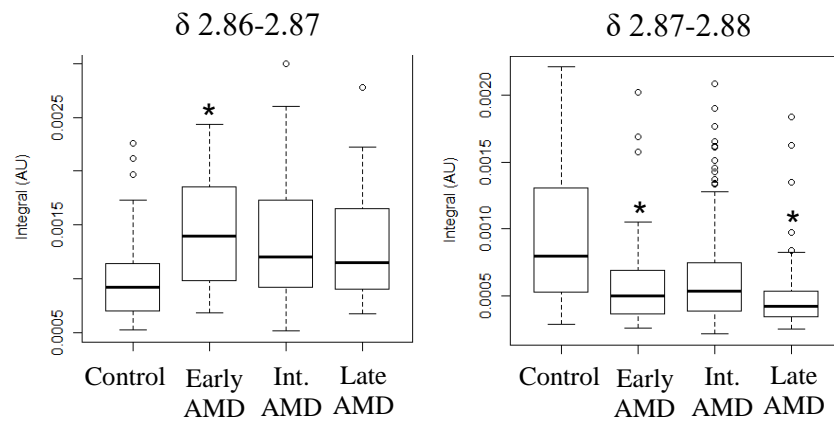

**Figure S6.** a) Spectra and b) boxplots for unassigned spectral region 2.86-2.88 ppm, which appears to separate controls and early AMD groups in the Coimbra cohort.

**Table S1.** Comorbidities characterizing each of the subject groups with corresponding percentages and statistical relevance. Statistical comparison (Person Chi<sup>2</sup> or Fisher Exact Test, according to Cochran Rules) between groups was performed (control *vs* early AMD; early *vs* intermediate AMD; intermediate *versus* late AMD. \*: p-values < 0.05 corresponding to

|                      | Control | Early AMD | Intermediate AMD | Late AMD |
|----------------------|---------|-----------|------------------|----------|
| Coimbra cohort       | n = 53  | n = 57    | n = 141          | n = 54   |
| Hypertension, n (%)  | 26 (49) | 30 (53)   | 81 (57)          | 35 (65)  |
| Dyslipidemia, n (%)  | 26 (49) | 32 (56)   | 63 (47)          | 28 (52)  |
| Heart disease, n (%) | 10 (19) | 8 (14)    | 33 (23)          | 10 (19)  |
| Blood disease, n (%) | 1 (2)   | 0 (0)     | 5 (4)            | 4 (8)    |
| Renal disease, n (%) | 1 (2)   | 2 (4)     | 7 (5)            | 3 (6)    |
| Liver disease, n (%) | 0 (0)   | 1 (2)     | 1 (1)            | 3 (6)    |

comparison with previously indicated group.



|                           |               |               |               |               |
|---------------------------|---------------|---------------|---------------|---------------|
| Prior cancer, n (%)       | 5 (10)        | 4 (7)         | 12 (9)        | 4 (8)         |
| Rheumatic disease, n (%)  | 0 (0)         | 1 (2)         | 1 (1)         | 3 (6)         |
| Neurologic disease, n (%) | 10 (19)       | 12 (21)       | 20 (15)       | 9 (17)        |
| Thyroid disease, n (%)    | 9 (17)        | 4 (7)         | 12 (9)        | 0 (0) *       |
| <b>Boston cohort</b>      | <b>n = 47</b> | <b>n = 33</b> | <b>n = 66</b> | <b>n = 48</b> |
| Hypertension, n (%)       | 14 (30)       | 8 (24)        | 25 (37)       | 23 (47)       |
| Dyslipidemia, n (%)       | 17 (36)       | 11 (33)       | 28 (42)       | 23 (47)       |
| Heart disease, n (%)      | 2 (4)         | 7 (21) *      | 8 (12)        | 7 (15)        |
| Blood disease, n (%)      | 5 (11)        | 4 (12)        | 6 (9)         | 2 (4)         |
| Renal disease, n (%)      | 2 (4)         | 2 (6)         | 2(3)          | 6 (13)        |
| Liver disease, n (%)      | 2 (4)         | 1 (3)         | 1 (2)         | 1 (2)         |
| Prior cancer, n (%)       | 14 (30)       | 9 (27)        | 30 (46)       | 14 (29)       |
| Rheumatic disease, n (%)  | 4 (9)         | 4 (12)        | 11 (17)       | 10 (21)       |
| Neurologic disease, n (%) | 3 (7)         | 2 (6)         | 8 (12)        | 3 (6)         |
| Thyroid disease, n (%)    | 8 (17)        | 2(6)          | 14 (21) *     | 1 (2)         |

**Table S2.** Metabolite identification in the  $^1\text{H}$  NMR spectrum of urine of a control subject (Coimbra cohort). The bottom section of the table lists the unassigned spin systems observed in this work to change according to AMD stage. 2-HIBA, 2-hydroxyisobutyrate; 2-KG, 2-ketoglutarate; 2-Py, *N*-methyl-2-pyridone-5-carboxamide;  $\beta$ -HBA:  $\beta$ -hydroxybutyrate; 3-HIVA: 3-hydroxyisovalerate; 4-DEA: 4-deoxyerythronic acid; 4-DTA: 4-deoxythreonic acid; 4-HPA: 4-

hydroxyphenylacetate; GAA: guanidoacetate; IS: indoxyl sulphate; *p*-CS: *para*-cresol sulphate;

| $\delta_{\text{H}}$ ppm (multiplicity, assignment/ $\delta_{\text{C}}$ ppm) | PAG:  |
|-----------------------------------------------------------------------------|-------|
|                                                                             | phen  |
|                                                                             | ylace |
|                                                                             | tylgl |
|                                                                             | utami |
|                                                                             | ne;   |
|                                                                             | TMA   |
|                                                                             | :     |
|                                                                             | trime |
|                                                                             | thyla |
|                                                                             | mine; |
|                                                                             | TMA   |
|                                                                             | O:    |
|                                                                             | trime |
|                                                                             | thyla |
|                                                                             | mine  |

-*N*-oxide. *U*<sub>*i*</sub>, unassigned resonances according to Table 2.

(please see next 2 pages for full table)

|                       |                                                                                                                                                                             |
|-----------------------|-----------------------------------------------------------------------------------------------------------------------------------------------------------------------------|
| 1,6-anhydroglucose    | 3.54 (m, C2H), 3.69 (m, C3H,C4H), 3.76 (dd), 4.10 (dd, CH), 4.62 (dd,CH <sub>2</sub> ), 5.46 (br, C1H)                                                                      |
| 1-methyl-histidine    | 3.07 (dd,βCH <sub>2</sub> ); 3.16 (dd, β'CH <sub>2</sub> ); 3.72 (s, CH <sub>3</sub> ); 3.96 (dd, αCH <sub>2</sub> ); 7.05 (s, ring); 7.78 (s, ring)                        |
| 2-HIBA                | 1.36 (s, CH <sub>3</sub> )                                                                                                                                                  |
| 2-KG                  | 3.45 (t, βCH <sub>2</sub> ), 3.01 (t, γCH <sub>2</sub> )                                                                                                                    |
| 2PY                   | 3.62 (s, CH <sub>3</sub> ); 6.67 (d, C3H ring/120.85); 7.97 (dd, C4H ring); 8.33 (d, C6H ring/145.46)                                                                       |
| 3-aminoisobutyricacid | 1.19 (d, CH <sub>3</sub> /17.87); 2.61 (m, αCH); 3.06 (dd, βCH <sub>2</sub> )                                                                                               |
| β-HBA                 | 1.20 (d, CH <sub>3</sub> ); 2.31(m, CH <sub>2</sub> ); 2.41 (m, CH <sub>2</sub> ); 4.15 (m, CH)                                                                             |
| 3-HIVA                | 1.27 (s, βCH <sub>3</sub> /31.02); 2.37 (s, αCH <sub>2</sub> )                                                                                                              |
| 3-methyl-histidine    | 3.28 (dd, βCH <sub>2</sub> /28.05); 3.75 (s, NCH <sub>3</sub> /35.18); αCH/56.52); 7.15 (s, C6H/126.33); 8.12 (s, C2H/140.81)                                               |
| 4-DEA                 | 1.11 (d, γCH <sub>3</sub> /18.26); 4.08 (d, αCH/78.67); 4.10 (m, βCH/71.54)                                                                                                 |
| 4-DTA                 | 1.23 (d, γCH <sub>3</sub> /21.37); 3.84 (d, αCH/79.04); 4.12 (m, βCH/71.59)                                                                                                 |
| 4-hydroxyhippurate    | 3.95 (s, CH <sub>2</sub> ); 6.98 (d, C3H, C5H ring); 7.76 (d, C4,2H, C6H ring)                                                                                              |
| 4-HPA                 | 3.46 (s, CH <sub>2</sub> /46.3); 6.86 (d, C3H, C5H ring/118.4); 7.17 (d, C2H, C6H ring/133.3)                                                                               |
| Acetate               | 1.93 (βCH <sub>3</sub> )                                                                                                                                                    |
| Acetoacetate          | 2.29 (s, CH <sub>2</sub> ); 3.46 (s, CH <sub>3</sub> )                                                                                                                      |
| Acetone               | 2.24 (s)                                                                                                                                                                    |
| Alanine               | 1.49 (d,βCH <sub>3</sub> /18.99); 3.78 (q, αCH)                                                                                                                             |
| Allantoin             | 5.39 (s, CH/66.19)                                                                                                                                                          |
| Ascorbate             | 3.76 (m, CH <sub>2</sub> (OH)); 4.01 (m, CH (OH)); 4.52 (d,C1H)                                                                                                             |
| Betaine               | 3.27 (s, CH <sub>3</sub> /56.13); 3.91 (s, CH <sub>2</sub> /69.11)                                                                                                          |
| Carnitine             | 2.44 (dd, αCH <sub>2</sub> /45.74; 3.23 (s, N(CH <sub>3</sub> ) <sub>3</sub> /72.80; 3.43 (m, γCH <sub>2</sub> /72.80; 4.57 (m, βCH <sub>2</sub> /66.88)                    |
| Choline               | 3.20 (s, N(CH <sub>3</sub> ) <sub>3</sub> /56.52); 3.52 (m, NH/70.60); 4.07 (m, CH <sub>2</sub> (OH))                                                                       |
| cis-aconitate         | 3.12 (d, CH/46.13); 5.79 (t, CH <sub>2</sub> /127.13)                                                                                                                       |
| Citrate               | 2.54 (d, α,β CH <sub>2</sub> /48.17); 2.69 (d, α×,β× CH <sub>2</sub> /48.17)                                                                                                |
| Creatine              | 3.04 (s, NCH <sub>3</sub> /39.66); 3.94 (s, NCH <sub>2</sub> /56.55)                                                                                                        |
| Creatinine            | 3.05 (s, NCH <sub>3</sub> /32.86); 4.06 (s, NCH <sub>2</sub> /59.05)                                                                                                        |
| DMA                   | 2.73 (s, CH <sub>3</sub> /37.41)                                                                                                                                            |
| DMG                   | 2.93 (s, (CH <sub>3</sub> ) <sub>2</sub> /46.21); 3.72 (s, CH)                                                                                                              |
| Formate               | 8.47 (s, CH/173.97)                                                                                                                                                         |
| Fumarate              | 6.53 (s, CH)                                                                                                                                                                |
| Furoylglycine         | 3.93 (s, CH <sub>2</sub> ); 6.65 (dd, C4H ring/114.98); 7.19(d, C3H ring); 7.70 (d, C5H ring)                                                                               |
| Galactose             | 3.49 (dd, C4H), 3.64 (dd, C3H), 3.75 (m, C1H, C2H, CH <sub>2</sub> ), 3.83 (m, C3H), 3.93 (d, C2H), 3.98 (d, C2H), 4.10 (t, C1H), 4.60 (d, CH <sub>2</sub> ), 5.28 (d, C5H) |
| α-Glucose             | 3.23 (dd, C2H); 3.44 (m, C4H); 3.50 (t, C3H); 3.72 (dd, C6H'); 3.90 (m, C6H); 4.65 (d, C1H)                                                                                 |
| β-Glucose             | 3.42 (t, C4H); 3.54 (dd, CH); 3.71 (t, C3H); 3.77 (dd, C6H); 3.84 (m, C5H); 5.25 (d, C1H/94.97)                                                                             |
| Glutamine             | 2.15 (m, βCH <sub>2</sub> /29.24); 2.47 (m, γCH <sub>2</sub> /33.67); 3.79(t, αCH/57.41)                                                                                    |
| Glycine               | 3.57 (s, αCH <sub>2</sub> /44.45)                                                                                                                                           |
| GAA                   | 3.80 (s, CH <sub>2</sub> /47.44)                                                                                                                                            |
| Hippurate             | 3.97 (d, CH <sub>2</sub> /46.65); 7.56 (t, C4H, C6H ring/131.60); 7.64 (t, C3H, C5H ring/134.99); 7.83(d, C4H/129.97); 8.52 (br, NH)                                        |
| Histidine             | 3.18 (dd, βCH <sub>2</sub> /30.40); 3.28 (dd, β'CH <sub>2</sub> /30.40);4.01(dd, αCH <sub>2</sub> /57.64); 7.13 (s, C4H ring/120.05); 7.98 (s, C2H ring/138.74)             |
| Hypoxanthine          | 8.20 (s, C2H ring); 8.22 (s, C8H)                                                                                                                                           |
| IS                    | 7.21 (dd, C8H/122.53), 7.28 (dd, C7H/125.01), 7.36 (s, C2H/119.08), 7.51 (d, C6H/115.04), 7.70 (d, C9H/120.57)                                                              |
| Isoleucine            | 0.94 (t, δCH <sub>3</sub> ); 1.01 (d, βCH <sub>2</sub> ); 1.26 (m, γCH <sub>2</sub> ); 1.47(m, β'CH <sub>2</sub> ); 1.98 (m, γ'CH <sub>2</sub> ); 3.62 (d, αCH)             |

|                 |                                                                                                                                                                                                                                                                                                                                                                                                                   |
|-----------------|-------------------------------------------------------------------------------------------------------------------------------------------------------------------------------------------------------------------------------------------------------------------------------------------------------------------------------------------------------------------------------------------------------------------|
| Lactate         | 1.34 (d, CH <sub>3</sub> /22.43); 4.11 (q, CH/71.53)                                                                                                                                                                                                                                                                                                                                                              |
| Lactose         | 3.28 (dd, C <sub>2</sub> H); 3.55 (m, C' <sub>2</sub> H); 3.59 (dd, C <sub>2</sub> H); 3.66 (m, C' <sub>3</sub> H, C <sub>3</sub> H, C <sub>5</sub> H); 3.73 (m, C' <sub>6</sub> H, C' <sub>5</sub> H); 3.79 (m, C <sub>6</sub> H); 3.86 (m, C <sub>6</sub> H, C <sub>3</sub> H); 3.94 (m, C <sub>6</sub> H, C' <sub>4</sub> H, C <sub>4</sub> H); 4.46 (d, C' <sub>1</sub> H/ 105.8); 5.25 (d, C <sub>1</sub> H) |
| Leucine         | 0.96 (t, γCH <sub>3</sub> ); 1.7 (m, CH <sub>2</sub> ); 3.73 (t, αCH)                                                                                                                                                                                                                                                                                                                                             |
| Lysine          | 1.48 (m, γCH <sub>2</sub> /24.28); 1.73 (m, δCH <sub>2</sub> /29.06); 1.92 (m, βCH <sub>2</sub> /32.60); 3.03 (t, εCH <sub>2</sub> /42.02); 3.77 (t, αCH/57.28)                                                                                                                                                                                                                                                   |
| Malonate        | 3.11 (s, CH <sub>2</sub> /48.7)                                                                                                                                                                                                                                                                                                                                                                                   |
| NMND            | 4.48 (s, NCH <sub>3</sub> /51.30); 8.18 (m, C <sub>5</sub> H ring); 8.90 (d, C <sub>4</sub> H ring); 8.97 (d, C <sub>6</sub> H ring); 9.29 (s, C <sub>2</sub> H ring)                                                                                                                                                                                                                                             |
| <i>p</i> -CS    | 2.35 (s, CH <sub>3</sub> ); 7.21 (d, C <sub>2</sub> H, C <sub>6</sub> H ring/124.12); 7.29 (C <sub>3</sub> H, C <sub>5</sub> H ring/125.04)                                                                                                                                                                                                                                                                       |
| PAG             | 1.93 (m, βCH <sub>2</sub> ) ; 2.11 (m, β' <sub>2</sub> CH <sub>2</sub> ); 2.27 (t, γCH <sub>2</sub> /34.44); 3.67 (d, CH <sub>2</sub> ); 4.18 (m, αCH); 7.36 (m, C <sub>2</sub> H, C <sub>4</sub> H, C <sub>6</sub> H ring/132.01); 7.43 (m, C <sub>3</sub> H, C <sub>5</sub> H ring/131.84)                                                                                                                      |
| Pyruvate        | 2.38 (s, CH <sub>3</sub> )                                                                                                                                                                                                                                                                                                                                                                                        |
| Scyllo-inositol | 3.36 (s, CH)                                                                                                                                                                                                                                                                                                                                                                                                      |
| Succinate       | 2.41 (s, CH <sub>2</sub> /36.85)                                                                                                                                                                                                                                                                                                                                                                                  |
| Sucrose         | 3.48 (t, C <sub>4</sub> H), 3.56 (dd, C <sub>2</sub> H), 3.63 (s, C' <sub>1</sub> 'H <sub>2</sub> ), 3.77 (t, C <sub>3</sub> H), 3.83 (dd, CH <sub>2</sub> , C' <sub>6</sub> H <sub>2</sub> ), 3.85 (m, C <sub>5</sub> H), 3.89 (m, C' <sub>5</sub> H), 4.06 (t, C' <sub>4</sub> H), 4.22 (d, C' <sub>3</sub> H), 5.41 (d, C <sub>1</sub> H)                                                                      |
| Tartrate        | 4.35 (s, CH(OH))                                                                                                                                                                                                                                                                                                                                                                                                  |
| Taurine         | 3.26 (t, CH <sub>2</sub> SO <sub>3</sub> ); 3.43 (t, NCH <sub>2</sub> )                                                                                                                                                                                                                                                                                                                                           |
| Threonine       | 1.33 (d, CH <sub>3</sub> /22.44); 3.61 (d, βCH/63.36); 4.26 (dd, αCH/68.90)                                                                                                                                                                                                                                                                                                                                       |
| Trigonelline    | 4.44 (s, CH <sub>3</sub> /50.98); 8.09 (t, C <sub>3</sub> H ring); 8.84 (br, C <sub>2</sub> H, C <sub>4</sub> H ring); 9.12 (s, C <sub>6</sub> H ring/148.73)                                                                                                                                                                                                                                                     |
| TMA             | 3.89 (s, CH <sub>3</sub> /47.40)                                                                                                                                                                                                                                                                                                                                                                                  |
| TMAO            | 3.28 (s, CH <sub>3</sub> /62.31)                                                                                                                                                                                                                                                                                                                                                                                  |
| Tyrosine        | 3.06 (dd); 3.21 (dd); 3.95 (dd); 6.91 (d, C <sub>3</sub> H, C <sub>5</sub> H ring/118.83); 7.20 (d, C <sub>2</sub> H, C <sub>6</sub> H ring/124.15)                                                                                                                                                                                                                                                               |
| Urea            | 5.79 (br s, NH <sub>2</sub> )                                                                                                                                                                                                                                                                                                                                                                                     |
| Valine          | 0.99 (d, γCH <sub>3</sub> ); 1.04 (d, γ' <sub>2</sub> CH <sub>3</sub> ); 2.27 (m, βCH); 3.61 (d, αCH)                                                                                                                                                                                                                                                                                                             |
| Xylose          | 3.23 (dd, C <sub>3</sub> H), 3.33 (dd, C <sub>6</sub> H), 3.42 (t, C <sub>4</sub> H), 3.53 (dd, C <sub>3</sub> H), 3.63 (m, C <sub>6</sub> H, C <sub>5</sub> H, C <sub>4</sub> H), 3.93 (dd, C <sub>6</sub> H), 4.59 (d, C <sub>2</sub> H), 5.21 (d, C <sub>2</sub> H)                                                                                                                                            |

---

Unassigned spin systems varying with AMD evolution

---

|    |                    |
|----|--------------------|
| U1 | 6.58 (s)           |
| U2 | 7.68 (d)           |
| U3 | 4.40 (s), 8.79 (d) |
| U4 | 2.39 (d)           |
| U5 | 8.03 (s)           |
| U6 | 8.70 (d)           |
| U7 | 2.19 (s), 9.05 (s) |

---
